# Supplementary material
Source: PubMed Central journal article supplement (PMC2538806)
Supplement: 2008.154971_1.pdf [file 2008.154971_1.pdf]

## Supplement 1a

### Southern blots - *Kcnq2*

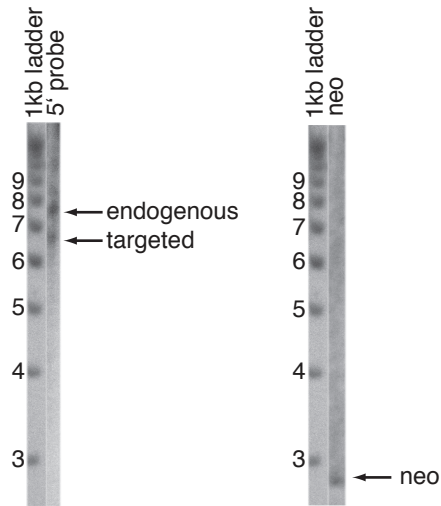

## Supplement 1b

### Southern blots - *Kcnq3*

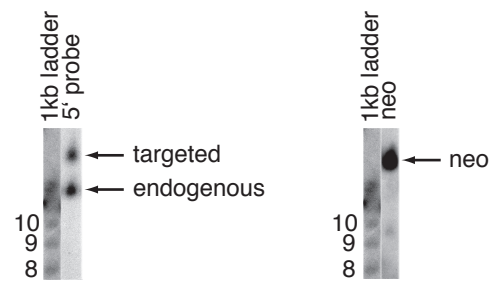

## Supplement 1c

### SSCP - *Kcnq2*

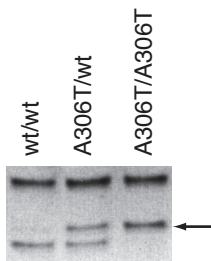

### loxP - *Kcnq2*

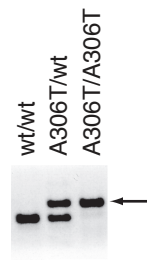

## Supplement 1d

### SSCP - *Kcnq3*

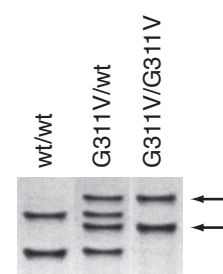

### loxP - *Kcnq3*

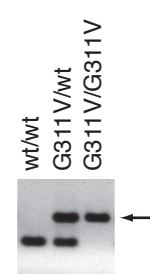

Singh, et al.

**Supplemental Figure 1:** Genomic Southern analysis of BamH1 cut embryonic stem cell DNA hybridized with a probe 5' of the targeting vector (left panels) and probed with the neo gene (right panels) confirming homologous recombination in *Kcnq2* (Figure 1A) and *Kcnq3* (Figure 1B) embryonic stem cells. Analysis of PCR-amplified tail DNA on single strand conformational polymorphism (SSCP) gels detected the presence of the A306T mutation in *Kcnq2* exon 6 (Figure 1C left, arrow denotes mutant) and agarose gels detected the corresponding presence of a single loxP site in *Kcnq2* intron 5 (Figure 1C right, arrow denotes mutant). SSCP analysis of PCR-amplified mouse tail DNA demonstrating band shifts (denoted by arrows) caused by the G311V point mutation in *Kcnq3* knockin mice (Figure 1D left, arrows denote mutant). Agarose gel of PCR amplified tail DNA showing the post-excision loxP site in intron 6 of *Kcnq3* (Figure 1D right, arrow denotes mutant).

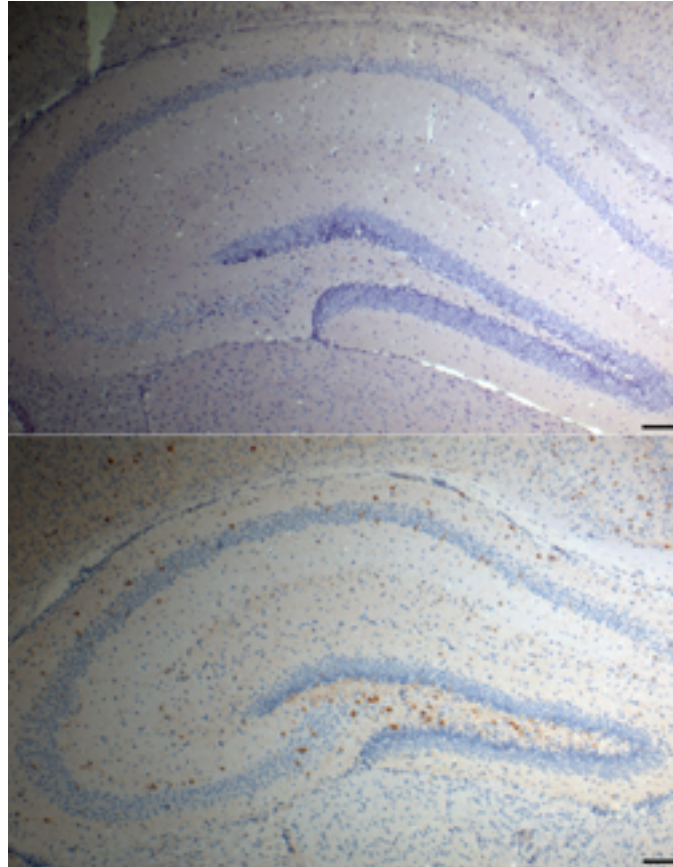

**Singh, et al.**

**Supplemental Figure 2:** An absence of NPY upregulation in the stratum lucidum of young homozygous mutant mice. No expression of NPY in the stratum lucidum or hilar mossy fibers of a P30 B6.129 *Kcnq2*<sup>A306T/A306T</sup> homozygous mutant mouse (top panel). In a P11 FVB.129 *Kcnq3*<sup>G311V/G311V</sup> homozygous mutant mouse a few hours following a documented seizure, no upregulation of NPY in the stratum lucidum is seen, although a slight increase in expression of NPY is seen in the hilar mossy fibers (bottom panel). In both cases, normal NPY expression is seen in hilar interneurons. Scale bars, 100µm.

**Table S1.** Number of behavioral seizures over a 12-hour light period as a function of age in FVB.129-Kcnq3<sup>G311V/G311V</sup> mice

| <b>age<br/>(days)</b> | <b>P21-<br/>25</b> | <b>P26-<br/>30</b> | <b>P31-<br/>35</b> | <b>P36-<br/>40</b> | <b>P41-<br/>45</b> | <b>P46-<br/>50</b> | <b>P51-<br/>55</b> | <b>P56-<br/>60</b> | <b>P61-<br/>65</b> | <b>P66-<br/>70</b> | <b>P71-<br/>75</b> | <b>P76-<br/>80</b> | <b>P81-<br/>85</b> | <b>P86-<br/>90</b> | <b>P91-<br/>95</b> | <b>P96-<br/>100</b> | <b>P100-<br/>105</b> | <b>P106-<br/>110</b> |
|-----------------------|--------------------|--------------------|--------------------|--------------------|--------------------|--------------------|--------------------|--------------------|--------------------|--------------------|--------------------|--------------------|--------------------|--------------------|--------------------|---------------------|----------------------|----------------------|
| <b>1</b>              | <b>9*</b>          | <b>5*</b>          |                    |                    |                    |                    |                    |                    |                    |                    |                    |                    |                    |                    |                    |                     |                      |                      |
| <b>2</b>              | <b>1*</b>          | <b>0</b>           | <b>4</b>           | <b>7</b>           | <b>0*</b>          |                    |                    |                    |                    |                    |                    |                    |                    |                    |                    |                     |                      |                      |
| <b>3</b>              |                    | <b>6*</b>          | <b>6*</b>          |                    |                    |                    |                    |                    |                    |                    |                    |                    |                    |                    |                    |                     |                      |                      |
| <b>4</b>              |                    |                    | <b>1*</b>          | <b>2</b>           | <b>5</b>           | <b>6</b>           | <b>25</b>          | <b>9</b>           | <b>21</b>          | <b>40*</b>         |                    |                    |                    |                    |                    |                     |                      |                      |
| <b>5</b>              |                    |                    | <b>0*</b>          | <b>2</b>           | <b>4</b>           | <b>21</b>          | <b>0</b>           | <b>6*</b>          |                    |                    |                    |                    |                    |                    |                    |                     |                      |                      |
| <b>6</b>              |                    |                    | <b>2*</b>          | <b>16</b>          | <b>19</b>          | <b>4</b>           | <b>0</b>           | <b>15</b>          | <b>19</b>          | <b>32</b>          | <b>67</b>          | <b>110</b>         | <b>24*</b>         |                    |                    |                     |                      |                      |
| <b>7</b>              |                    |                    |                    | <b>5*</b>          | <b>18</b>          | <b>18</b>          | <b>0</b>           | <b>0*</b>          |                    |                    |                    |                    |                    |                    |                    |                     |                      |                      |
| <b>8</b>              |                    |                    |                    |                    | <b>0*</b>          | <b>7</b>           | <b>19</b>          | <b>21</b>          | <b>21</b>          | <b>23</b>          | <b>40</b>          | <b>39</b>          | <b>25*</b>         |                    |                    |                     |                      |                      |
| <b>9</b>              |                    |                    |                    |                    |                    |                    | <b>0*</b>          | <b>18</b>          | <b>25</b>          | <b>0</b>           | <b>0</b>           | <b>0</b>           | <b>0</b>           | <b>0</b>           | <b>7</b>           | <b>0</b>            | <b>5</b>             | <b>6*</b>            |

mice correspond to Figure 4A; \*, monitoring was incomplete over the 5-day period

**Table S2.** Comparison of our grading scale of seizure characteristics to the Racine scale

| <b>Grade</b> | <b>Features</b>                                                                                 | <b>approximate Racine Equivalent<br/>(see ref 16)</b>                                                            |
|--------------|-------------------------------------------------------------------------------------------------|------------------------------------------------------------------------------------------------------------------|
| 1            | rapid running                                                                                   | stage 8-running and jumping                                                                                      |
| 2            | bilateral forelimb clonus, orofacial automatisms, jaw chomping, head clonus, occasional rearing | stage 1-mouth clonus<br>stage 2 head clonus<br>stage 4- bilateral forelimb clonus with rearing                   |
| 3            | Forelimb and hindlimb clonus                                                                    | stage 5-bilateral forelimb clonus with falling<br>stage 9-running and jumping followed by a tonic clonic seizure |
| 4            | Forelimb tonic extension and hindlimb clonus                                                    | stage 9-running and jumping followed by a tonic clonic seizure                                                   |
| 5            | Forelimb and hindlimb tonic extension                                                           | stage 9- running and jumping followed by a tonic clonic seizure                                                  |

Singh et al

**Table S3.** The *Kcnq2* A306T mutation does not affect the passive membrane properties of CA1 neurons.

| Membrane property                               | Mouse genotype              |                                 |                                     |
|-------------------------------------------------|-----------------------------|---------------------------------|-------------------------------------|
|                                                 | <i>Kcnq2</i> <sup>+/+</sup> | <i>Kcnq2</i> <sup>A306T/+</sup> | <i>Kcnq2</i> <sup>A306T/A306T</sup> |
| <b>Input Resistance (M<math>\Omega</math>)</b>  | 107 $\pm$ 4<br>(n = 17)     | 103 $\pm$ 5<br>(n = 9)          | 103 $\pm$ 4<br>(n = 10)             |
| <b>Series Resistance (M<math>\Omega</math>)</b> | 14.6 $\pm$ 0.3<br>(n = 15)  | 13.9 $\pm$ 0.3<br>(n = 9)       | 14.3 $\pm$ 0.3<br>(n = 8)           |
| <b>Resting Membrane Potential (mV)</b>          | -61.1 $\pm$ 0.7<br>(n = 7)  | -59.9 $\pm$ 0.7<br>(n = 8)      | -59.97 $\pm$ 0.8<br>(n = 10)        |
| <b>Capacitance (pF)</b>                         | 131 $\pm$ 5<br>(n = 11)     | 134 $\pm$ 13<br>(n = 9)         | 137 $\pm$ 11<br>(n = 10)            |

All values expressed as mean  $\pm$  S.E.M. Input resistance, series resistance, and resting membrane potential were taken from values reported by SealTest and MultiClamp Commander functions.

**Table S4.** The *Kcnq3* G311V mutation does not affect the passive membrane properties of B6;129 CA1 neurons.

| Membrane property                      | Mouse genotype                      |                                         |                                             |
|----------------------------------------|-------------------------------------|-----------------------------------------|---------------------------------------------|
|                                        | B6;129- <i>Kcnq3</i> <sup>+/+</sup> | B6;129- <i>Kcnq3</i> <sup>G311V/+</sup> | B6;129- <i>Kcnq3</i> <sup>G311V/G311V</sup> |
| <b>Input Resistance (MΩ)</b>           | 107 ± 4<br>(n = 17)                 | 105 ± 6<br>(n = 18)                     | 100 ± 4<br>(n = 16)                         |
| <b>Series Resistance (MΩ)</b>          | 14.6 ± 0.3<br>(n = 15)              | 14.0 ± 0.2<br>(n = 19)                  | 14.3 ± 0.3<br>(n = 25)                      |
| <b>Resting Membrane Potential (mV)</b> | -61.1 ± 0.7<br>(n = 7)              | -59.3 ± 0.5<br>(n = 15)                 | -59.3 ± 0.8<br>(n = 15)                     |
| <b>Capacitance (pF)</b>                | 131 ± 5<br>(n = 11)                 | 140 ± 4<br>(n = 21)                     | 132 ± 7<br>(n = 21)                         |

All values expressed as mean ± S.E.M. Input resistance, series resistance, and resting membrane potential were taken from values reported by SealTest and MultiClamp Commander functions.

**Table S5.** The *Kcnq3* G311V mutation does not affect the passive membrane properties of FVB;129 CA1 neurons.

| Membrane property                      | Mouse genotype                       |                                          |                                              |
|----------------------------------------|--------------------------------------|------------------------------------------|----------------------------------------------|
|                                        | FVB;129- <i>Kcnq3</i> <sup>+/+</sup> | FVB;129- <i>Kcnq3</i> <sup>G311V/+</sup> | FVB;129- <i>Kcnq3</i> <sup>G311V/G311V</sup> |
| <b>Input Resistance (MΩ)</b>           | 93 ± 6<br>(n = 6)                    | 93 ± 5<br>(n = 7)                        | 95 ± 4<br>(n = 14)                           |
| <b>Series Resistance (MΩ)</b>          | 13.5 ± 0.5<br>(n = 7)                | 13.8 ± 0.3<br>(n = 7)                    | 13.8 ± 0.3<br>(n = 16)                       |
| <b>Resting Membrane Potential (mV)</b> | -60.1 ± 2.4<br>(n = 5)               | -61.3 ± 1.5<br>(n = 6)                   | -58.35 ± 1.58<br>(n = 10)                    |
| <b>Capacitance (pF)</b>                | 160 ± 15<br>(n = 6)                  | 162 ± 7<br>(n = 6)                       | 155 ± 6<br>(n = 15)                          |

All values expressed as mean ± S.E.M. Input resistance, series resistance, and resting membrane potential were taken from values reported by SealTest and MultiClamp Commander functions.



### **Supplementary Videos 1 & 2**

Spontaneous seizures in N1F2 B6.129-*Kcnq2*<sup>A306T/A306T</sup> (video 1) and N1F2 B6.129-*Kcnq3*<sup>G310V/G310V</sup> (video 2) adult mice. Note that in each mutant, behavioral signs of seizure activity precede the onset of abnormal synchronization and cortical epileptic discharges, and may outlast them, consistent with a subcortical origin. Electrode montages are as described in Figure 3.

### **Supplementary Video 3**

Spontaneous generalized tonic clonic seizure in a P24 N5F2 FVB.129-*Kcnq2*<sup>A306T/A306T</sup> mouse. Note the almost instantaneous onset of a forelimb and hindlimb tonic extension seizure.

### **Supplementary Videos 4 and 5**

Recurrent generalized seizures in a P48 N5F2 FVB.129-*Kcnq3*<sup>G311V/G311V</sup> mouse. Compared to N5F2 FVB.129-*Kcnq2*<sup>A306T/A306T</sup>, FVB.129-*Kcnq3*<sup>G311V/G311V</sup> exhibit a longer duration to onset of a forelimb and hindlimb tonic extension seizure. From P33 to P82, over 600 seizures were recorded in this homozygous knockin mouse, including grade 5 (video 4) and grade 3 (video 5) seizures and no mossy fiber sprouting was seen after Timm staining.
